# Supplementary material for: Poly(vinyl alcohol) star polymers prepared via MADIX/RAFT polymerisationElectronic Supplementary Information (ESI) available: synthesis and NMR data of MADIX agents, polymerisation and analysis technique. See http://www.rsc.org/suppdata/cc/b4/b404763j/
Source: Royal Society of Chemistry journal article supplement (doi:10.1039/b404763j), 2004-01-01
Supplement: b404763j.doc [file b404763j.doc]

***Synthesis of MADIX/RAFT agent***

Approach to the synthesis of MADIX/RAFT agent for PVAc three-arm star

O

S

S

**1a**

**1**

Approach to the synthesis of MADIX/RAFT agent for PVAc four-arm star

**2a**

**2**

Approach to the synthesis of MADIX/RAFT agent for PVAc linear polymers

**3**

**Materials**

Pentaerithrol, 1,1,1-Tris(hydroxymethyl)propane, potassium salt of O-Ethylxanthic acid, methyl-2-bromopropionate were purchased from Aldrich and used without further purification.

**1. Reaction of core with 2-bromo propionyl bromide**[[1]](#footnote-2)

2.72 g (0.02 mol) Pentaerithrol (4 arm star) or 2.40 g (0.02 mol) 1,1,1-Tris(hydroxymethyl)propane (3 arm star) were dissolved in anhydrous chloroform (30 mL) and pyridine (5 mL). 19.1 g (0.09 mol) (4 arm star) or 14.9 g (0.07 mol) (3 arm star) 2-bromo propionyl bromide were added slowly to the ice cooled solution. The ice bath was removed and the mixture was stirred at ambient temperature for 48 hrs. Diluted hydrochloric acid (10%) was slowly added to the solution. The organic phase was then extracted with aqueous NaHCO3 (5 %) followed by the drying of the organic layer with Na2SO4. After evaporation of the solvent under reduced pressure a colourless compound was obtained.

**1a:** 1H-NMR (CDCl3): 0.89 (CH3-C, 3H, t), 1.76 (CH3-C-Br, 9H, d), 4.14 (CH-Br, 3H, q), 4.33 (CH2-O, 6H, b)

13C-NMR (CDCl3): 7.3 (CH3-C), 21.4 (CH3-C-Br), 39.6 (CH-Br), 41.5 (C-C-C) 65.2 (CH2-O, 6H, b), 169.6 (C=O)

**2a**: 1H-NMR (CDCl3): 1.74 (CH3-C-Br, 12H, d), 4.14 (CH-Br, 3H, q), 4.29 (CH2-O, 6H, m)

13C-NMR (CDCl3): 21.3 (CH3-C-Br), 39.6 (CH-Br, 3H, q), 43.0 (C-C-C) 62.8 (CH2-O, 6H, b), 169.4 (C=O).

**2. Reaction of bromide with O-Ethylxanthic acid, potassium salt**

The intermediate product was redissolved in chloroform (100 mL) and stirred with a 10-fold excess of o-Ethylxanthic acid, potassium salt for 3 days. The suspended remaining sodium (O-ethyl) xanthate was filtered off and washed several times with chloroform. After evaporation of the solvent the product was purified using column chromatography on silica gel (hexan: ethyl acetate= 7:3). The product was obtained as a yellow compound (0.006-0.008 mol, 30-40%).

**1**: 1H-NMR (CDCl3): 0.83 (CH3-C, 3H, b), 1.42 (CH3-CH2-O, 9H, t), 1.56 (CH3-CH-S, 9H, d), 4.40 (CH-S, 3H, q), 4.07 (CH2-O, 6H, m), 4.63 (CH3-CH2-O, 6H, q),

13C-NMR (CDCl3): 7.9 (CH3-C), 13.6 (CH3-CH2-O), 16.8 (CH3-C-S), 42.5 (C-C-C), 47.1 (CH-S), 65.2 (CH2-O), 70.9 (CH3-CH2-O), 171.2 (C=O), 211.9 (C=S)

**2**: 1H-NMR (CDCl3): 1.43 (CH3-CH2-O, 12H, t), 1.58 (CH3-CH-S, 12H, d), 4.63 (CH3-CH2-O, 8H, q), 4.40 (CH-S, 4H, q), 4.17 (CH2-O, 8H, m)

13C-NMR (CDCl3): 13.6 (CH3-CH2-O), 16.5 (CH3-C-S), 44.0 (C-C-C), 47.0 (CH-S), 62.8 (CH2-O), 70.4 (CH3-CH2-O), 171.2 (C=O), 211.9 (C=S)

**3**: 1H-NMR (CDCl3): 1.39 (CH3-CH2-O, 3H, t), 1.56 (CH3-CH-S, 3H, d), 3.72 (O-Me, 3H, s), 4.37 (CH-S, 1H, q), 4.60 (CH3-CH2-O, 2H, q),

13C-NMR (CDCl3): 13.5 (CH3-CH2-O), 16.8 (CH3-C-S), 46.9 (CH-S), 52.6 (CH3-O), 70.2 (CH3-CH2-O), 171.7 (C=O), 211.9 (C=S)

***Polymerisation***

Stock solutions with initial MADIX group concentrations of 2.2·10-2 mol L-1 (concentration of (**1**)= 7.3·10-2 mol L-1, concentration of (**2**)= 5.5·10-2 mol L-1) and initiator (AIBN) (2.2·10-3 mol L-1) in vinylacetate (destabilised by passing over a column of basic aluminium oxide) were prepared. Six samples of each stock solution were transferred to individual ampoules, which were thoroughly deoxygenated by three freeze-pump-thaw cicles with nitrogen. The air-tight sealed ampoules (to prevent evaporation of the highly volatile VA) were then placed in a constant temperature water bath at 60 °C, and an ampoule was removed at regular time intervals. The reactions were stopped by cooling the solutions in an ice bath. The polymer was isolated by evaporating off the residual VA; initially in a fume cupboard to remove the bulk of the liquid, and then in a vacuum oven at 30 °C. Final conversions were measured by gravimetry.

***Hydrolysis***

Poly(vinyl acetate) was hydrolysed to poly(vinyl alcohol) by dissolving 100 mg of polymer in methanol (10 mL). A solution of 200 mg potassium hydroxide dissolved in methanol (10 mL) was added to the polymer solution. The solution was stirred for 2 hour. The precipitated poly(vinyl alcohol) was then filtered off and washed several times with methanol prior to drying.

**3 arm star**

| **conversion** | **Mtheo** | **Mn, GPC (PVAc)a)** | **PDI (PVAc)** | **Mn, GPC (PVA)b)** | **PDI (PVA)** |
| --- | --- | --- | --- | --- | --- |
| 0.01 | 1290 | 1200 | 1.17 | - | - |
| 0.03 | 3870 | 2700 | 1.41 | - | - |
| 0.18 | 23220 | 18200 | 1.17 | 29000 | 1.18 |
| 0.42 | 54180 | 40000 | 1.22 | 49000 | 1.15 |
| 0.55 | 70950 | 45000 | 1.40 | 61000 | 1.25 |

4 arm star

| **conversion** | **Mtheo** | **Mn, GPC (PVAc)a)** | **PDI (PVAc)** | **Mn, GPC (PVA)b)** | **PDI (PVA)** |
| --- | --- | --- | --- | --- | --- |
| 0.01 | 1720 | 1200 | 1.44 | - | - |
| 0.03 | 5160 | 5800 | 1.37 | - | - |
| 0.21 | 36120 | 29000 | 1.39 | 29000 | 1.30 |
| 0.38 | 65360 | 42000 | 1.20 | 55000 | 1.48 |
| 0.7 | 120400 | 50000 | 1.40 | 62000 | 1.17 |

a) GPC with THF as mobile phase using Mark-Houwink parameters *K* = 16×103 mL·g-1 and ** = 0.70

b) GPC with DMA as mobile phase using polystyrene standards

***Polymer characterization***

All NMR spectra were recorded using a Bruker 300 MHz spectrometer using CDCl3 or D2O as solvent. Molecular weight distributions were determined by size exclusion chromatography (SEC) using a Shimadzu modular system, comprising an auto-injector, a Polymer Laboratories 5.0 m bead-size guard column (50 × 7.5 mm), followed by three linear PL columns (105, 104, and 103 Å) and a differential refractive index detector. The eluent was THF at 25°C with a flow rate of 1 mL·min-1. The system was calibrated using narrow polystyrene standards ranging from 500 to 106 g·mol-1. The obtained molecular weights were corrected for poly(VA) via the universal calibration using the Mark-Houwink parameters *K* = 16×103 mL·g-1 and ** = 0.70.[[[2]](#footnote-3)] The Mark-Houwink parameters for polystyrene to effect the universal calibration read *K* = 14.1×10-5 dL·g-1 and ** = 0.70. Poly(vinyl alcohol) and for comparison additionally Poly(vinyl acetate) were analysed using a similar GPC system with *N,N*-Dimethylacetate as mobile phase. The system was calibrated against linear polystyrene standards.

1. (a) B. Wong, K. Ohno, D. M. Haddleton, *Pol. Mat. Sci. Engineering* **2001**, *84*, 957. (b) M. Stenzel-Rosenbaum, T. P. Davis, A. G. Fane, V. Chen *Macromolecules* **2001**, *34*, 5433. [↑](#footnote-ref-2)
2. F. Cane, T. Capaccioli, *Eur. Polym. J.* **1978**, *14*, 185. [↑](#footnote-ref-3)
